# Supplementary material for: 2′-Epi-uscharin from the Latex of Calotropis gigantea with HIF-1 Inhibitory Activity
Source: PubMed Central journal article supplement — Sci Rep. 2014 Apr 23;4:4748. doi: 10.1038/srep04748 (PMC5381191; doi:10.1038/srep04748), 2014-04-23
Supplement: srep04748-s1.pdf [file srep04748-s1.pdf]

## Supplementary Information

### ***2'-Epi-uscharin from the Latex of *Calotropis gigantea* with HIF-1 Inhibitory Activity***

**Supawadee Parhira<sup>1</sup>, Guo-Yuan Zhu<sup>1</sup>, Ren-Wang Jiang<sup>2</sup>, Liang Liu<sup>1</sup>, Li-Ping Bai<sup>1\*</sup> and Zhi-Hong Jiang<sup>1\*</sup>**

<sup>1</sup> State Key Laboratory of Quality Research in Chinese Medicine, Macau Institute for Applied Research in Medicine and Health, Macau University of Science and Technology, Taipa, Macau SAR, People's Republic of China

<sup>2</sup> Institute of Traditional Chinese Medicine and Natural Products, College of Pharmacy, Jinan University, Guangzhou, People's Republic of China

\*Author to whom correspondence should be addressed;

E-Mail: [zhjiang@must.edu.mo](mailto:zhjiang@must.edu.mo) (Z.H.J.); Tel.: +853-88972777; fax: +853-28825886 and [lpbai@must.edu.mo](mailto:lpbai@must.edu.mo) (L.P.B.); Tel.: +853-88972403; fax: +853-28825886.

## Content

- Figure S1.**  $^1\text{H}$  NMR (600 MHz,  $\text{CDCl}_3$ ) spectrum of compound **1**
- Figure S2.**  $^{13}\text{C}$  NMR (150 MHz,  $\text{CDCl}_3$ ) spectrum of compound **1**
- Figure S3.**  $^1\text{H}$ - $^1\text{H}$  COSY spectrum of compound **1**
- Figure S4.** HSQC spectrum of compound **1**
- Figure S5.** HMBC spectrum of compound **1**
- Figure S6.** NOESY spectrum of compound **1**
- Figure S7.** ESI-TOF-MS spectrum of compound **1**
- Figure S8.** UV-VIS absorption spectrum of the new compound **2**
- Figure S9.** IR spectrum of the new compound **2**
- Figure S10.**  $^1\text{H}$  NMR (600 MHz,  $\text{CDCl}_3$ ) spectrum of the new compound **2**
- Figure S11.**  $^{13}\text{C}$  NMR (150 MHz,  $\text{CDCl}_3$ ) spectrum of the new compound **2**
- Figure S12.**  $^1\text{H}$ - $^1\text{H}$  COSY spectrum of the new compound **2**
- Figure S13.** HSQC spectrum of the new compound **2**
- Figure S14.** HMBC spectrum of the new compound **2**
- Figure S15.** NOESY spectrum of the new compound **2**
- Figure S16.** ESI-TOF-MS spectrum of the new compound **2**
- Figure S17.**  $^1\text{H}$  NMR (600 MHz,  $\text{CD}_3\text{OD}$ ) spectrum of the new compound **2**
- Figure S18.**  $^{13}\text{C}$  NMR (150 MHz,  $\text{CD}_3\text{OD}$ ) spectrum of the new compound **2**
- Figure S19.**  $^1\text{H}$  NMR (600 MHz, pyridine- $d_5$ ) spectrum of the new compound **2**
- Figure S20.**  $^{13}\text{C}$  NMR (150 MHz, pyridine- $d_5$ ) spectrum of the new compound **2**

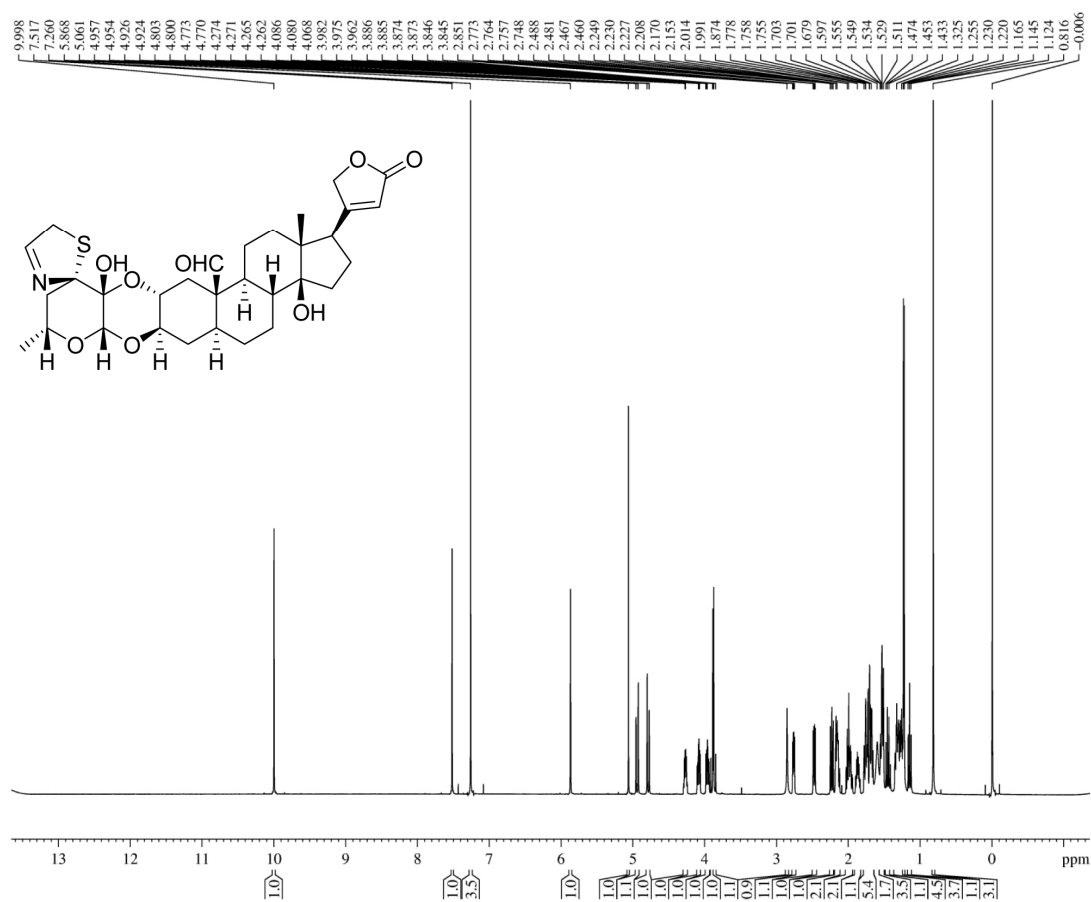

**Figure S1.** <sup>1</sup>H NMR (600 MHz, CDCl<sub>3</sub>) spectrum of compound **1**

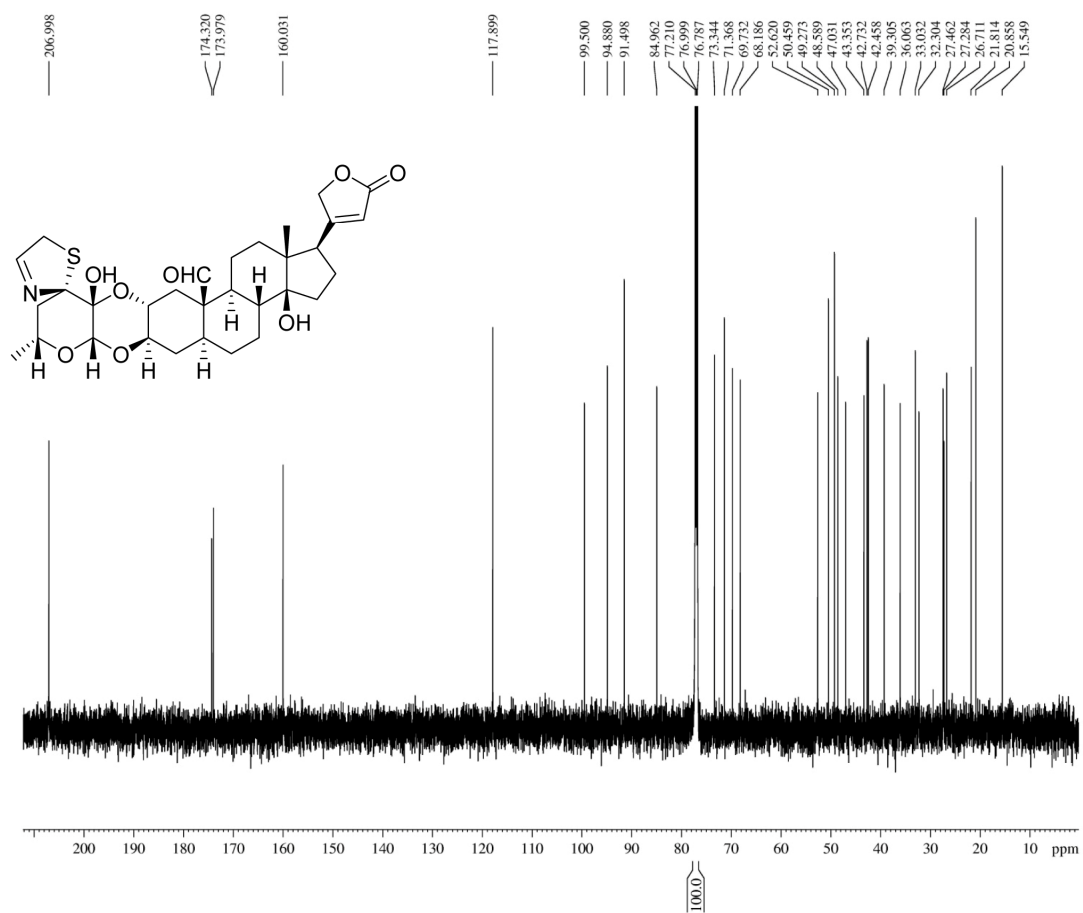

**Figure S2.**  $^{13}\text{C}$  NMR (150 MHz,  $\text{CDCl}_3$ ) spectrum of compound **1**

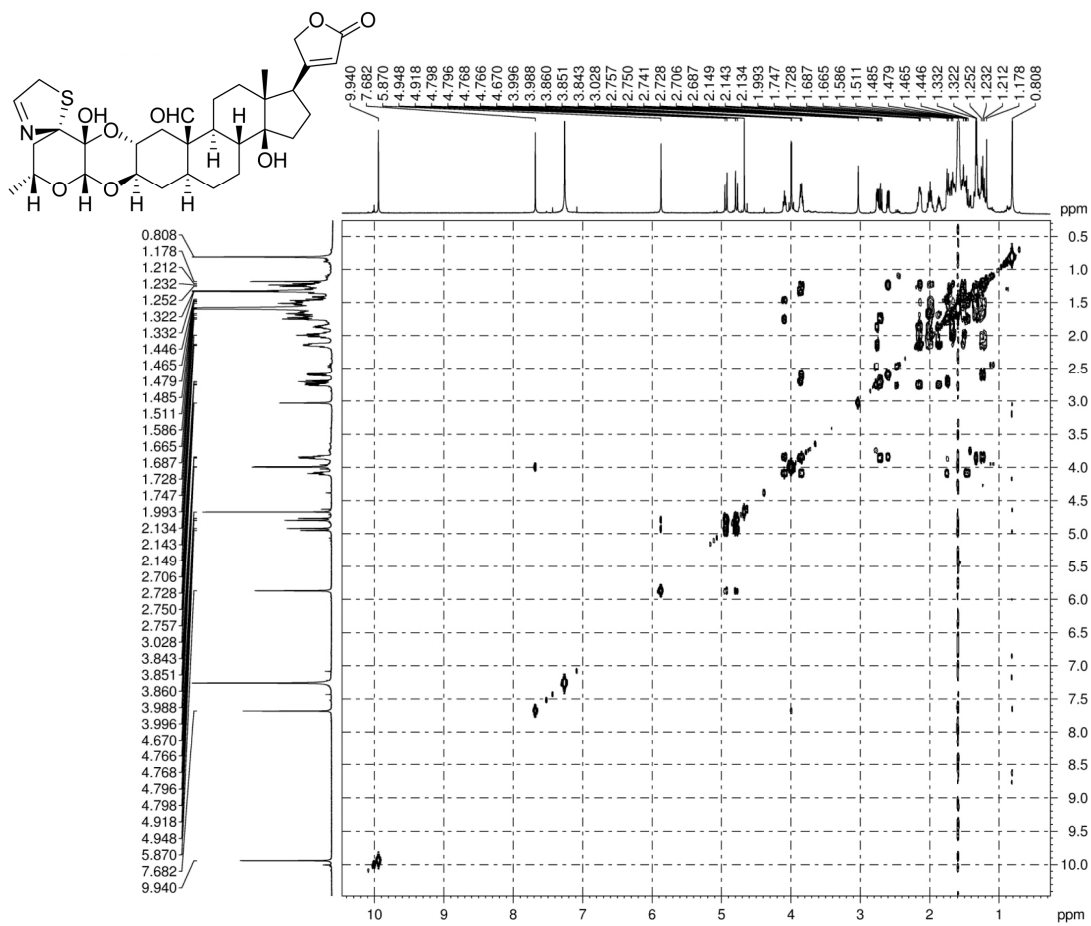

Figure S3.  $^1\text{H}$ - $^1\text{H}$  COSY spectrum of compound 1

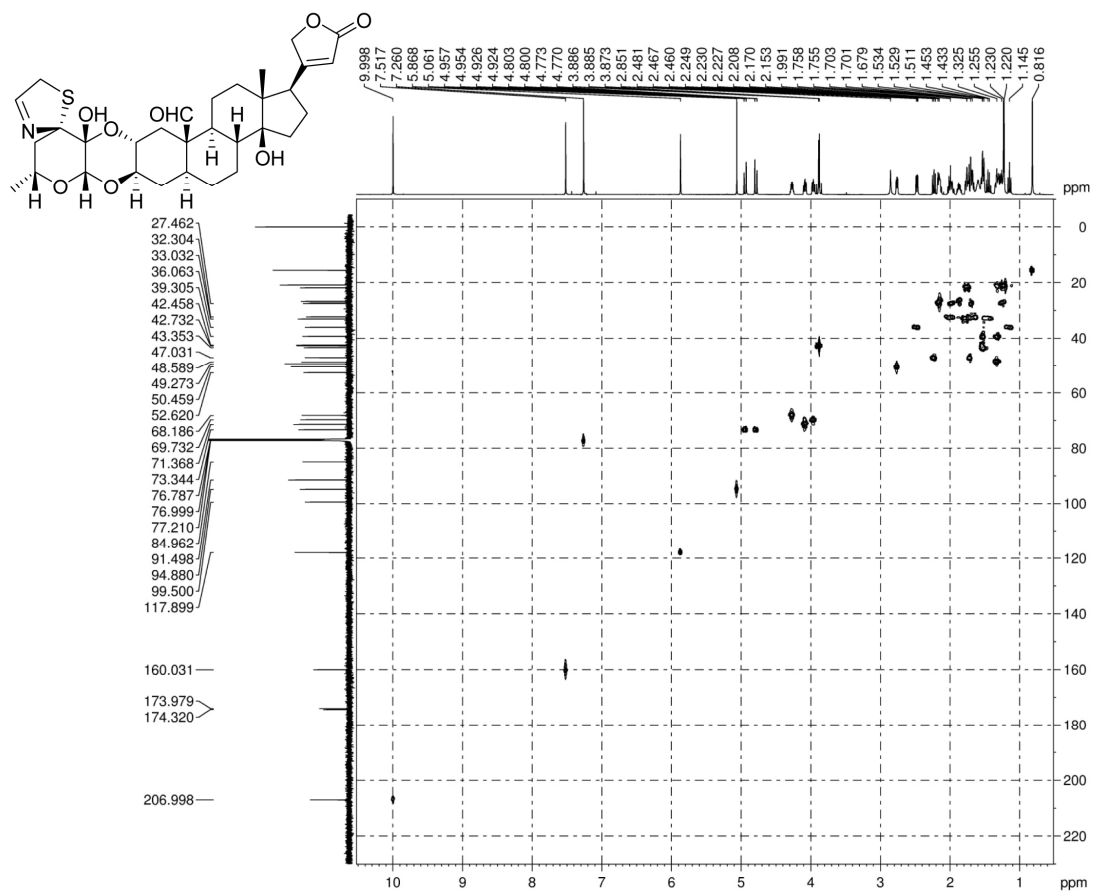

**Figure S4.** HSQC spectrum of compound 1

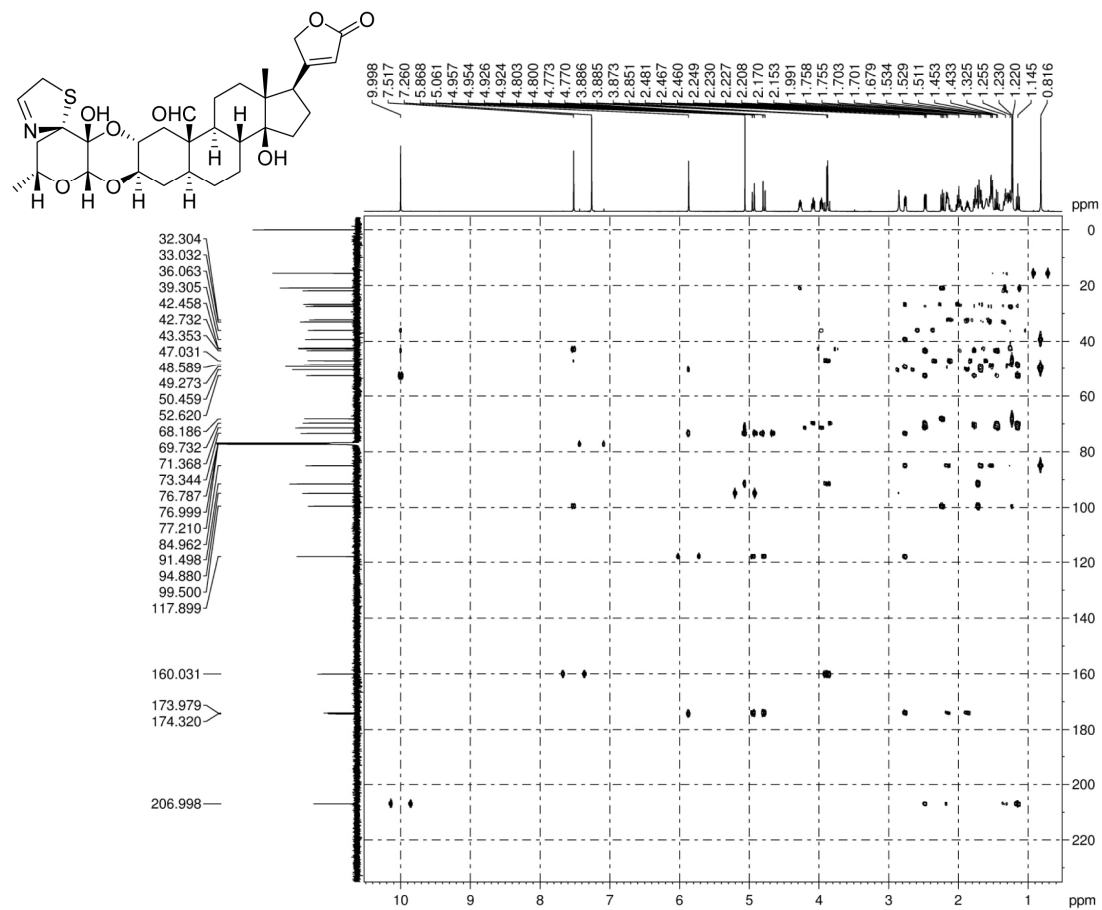

**Figure S5.** HMBC spectrum of compound **1**

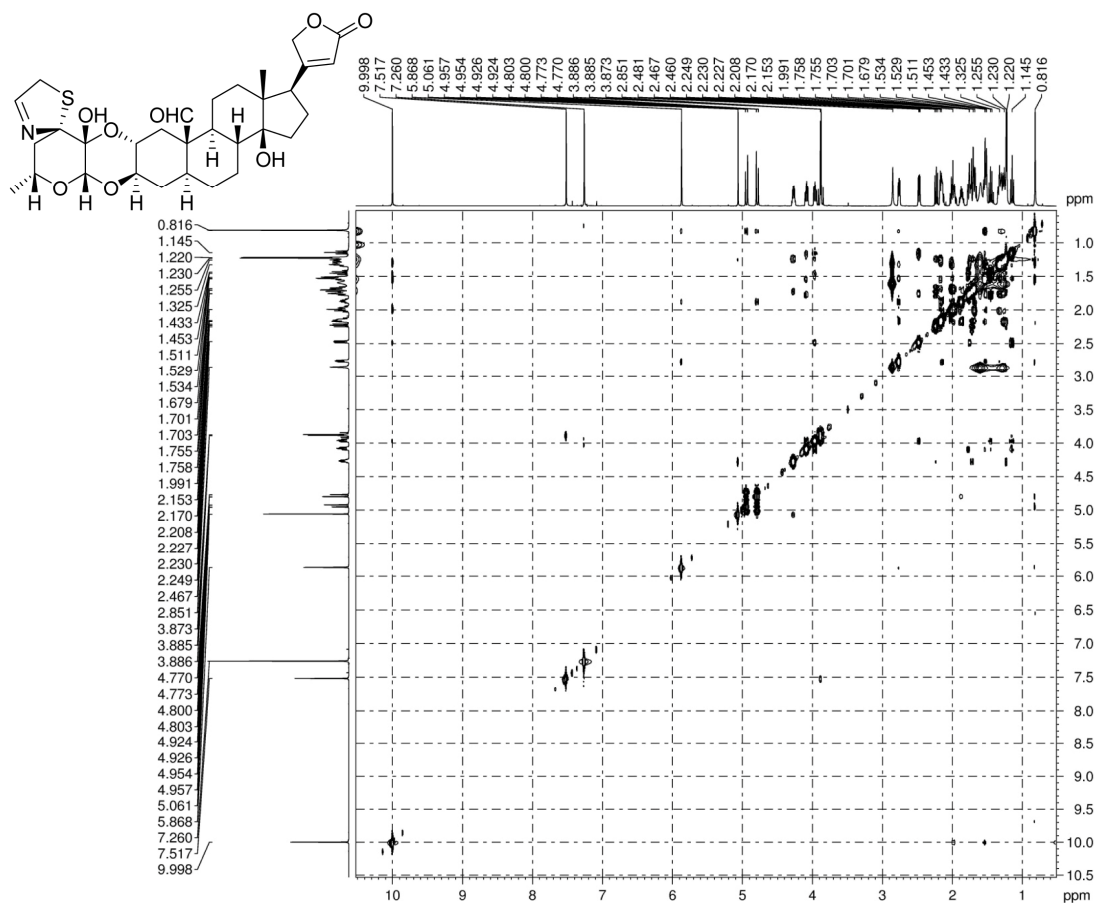

Figure S6. NOESY spectrum of compound 1

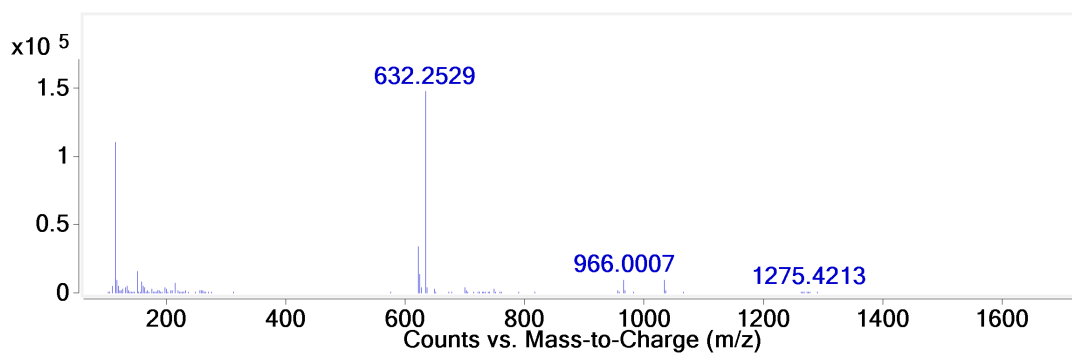

Figure S7. ESI-TOF-MS spectrum of compound 1



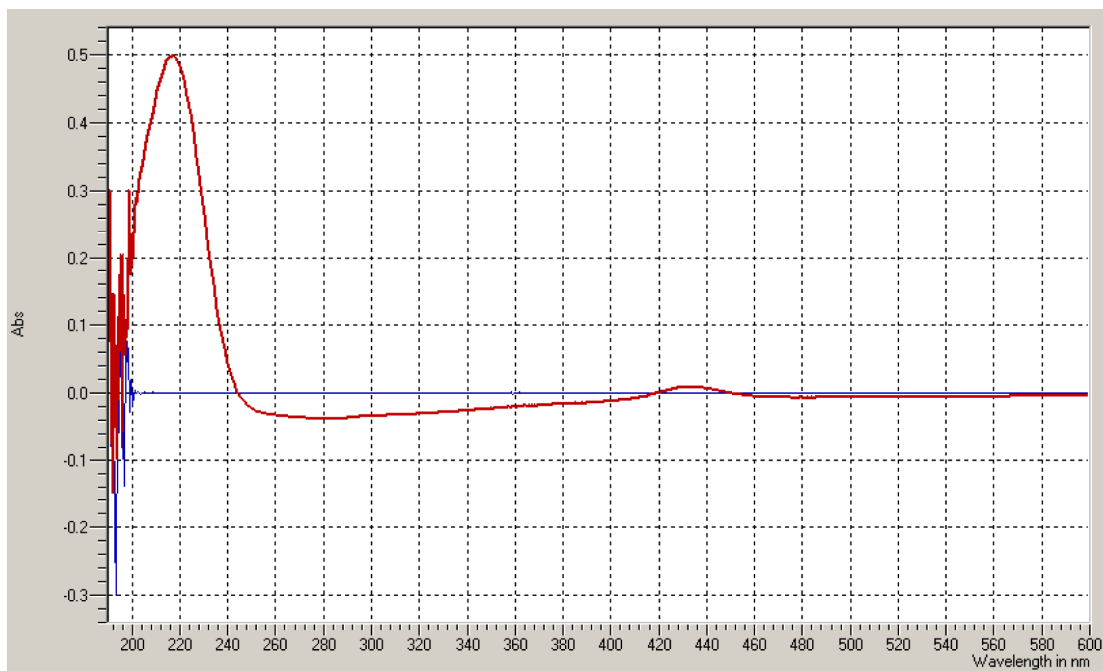

**Figure S8.** UV-VIS absorption spectrum of the new compound **2**

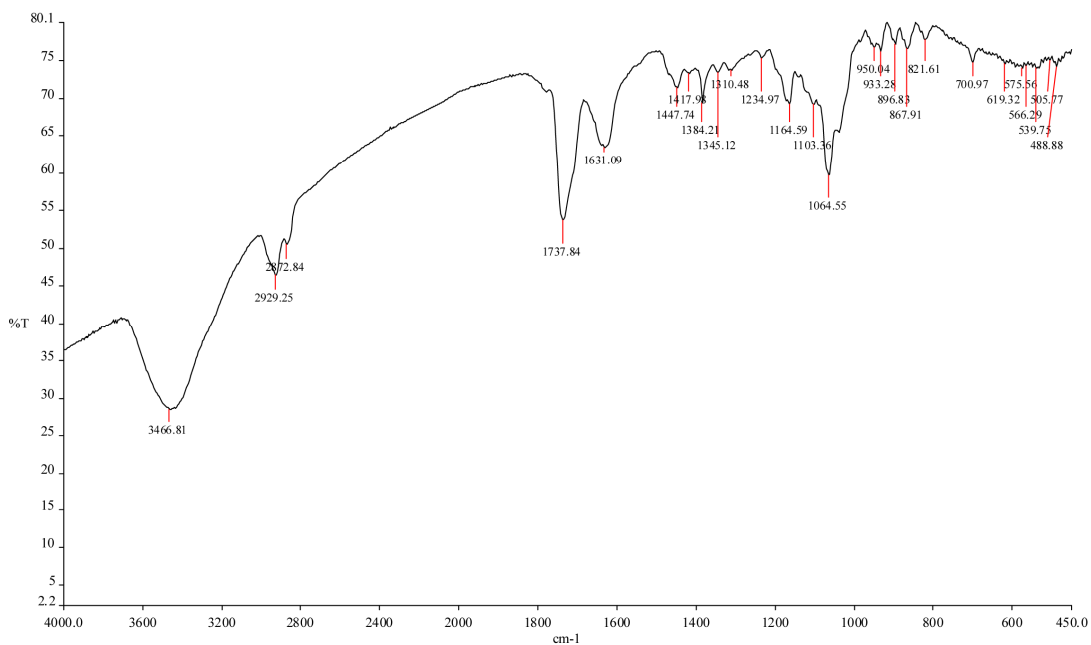

**Figure S9.** IR spectrum of the new compound **2**

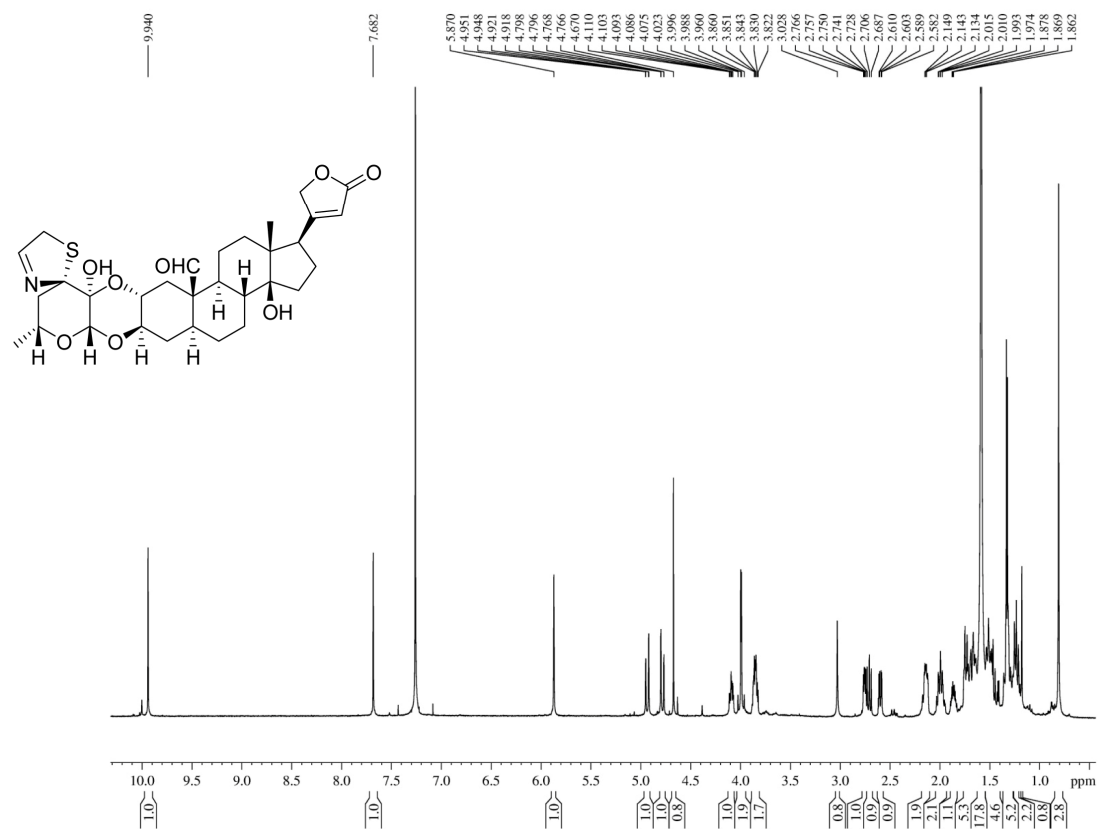

**Figure S10.** <sup>1</sup>H NMR (600 MHz, CDCl<sub>3</sub>) spectrum of the new compound **2**

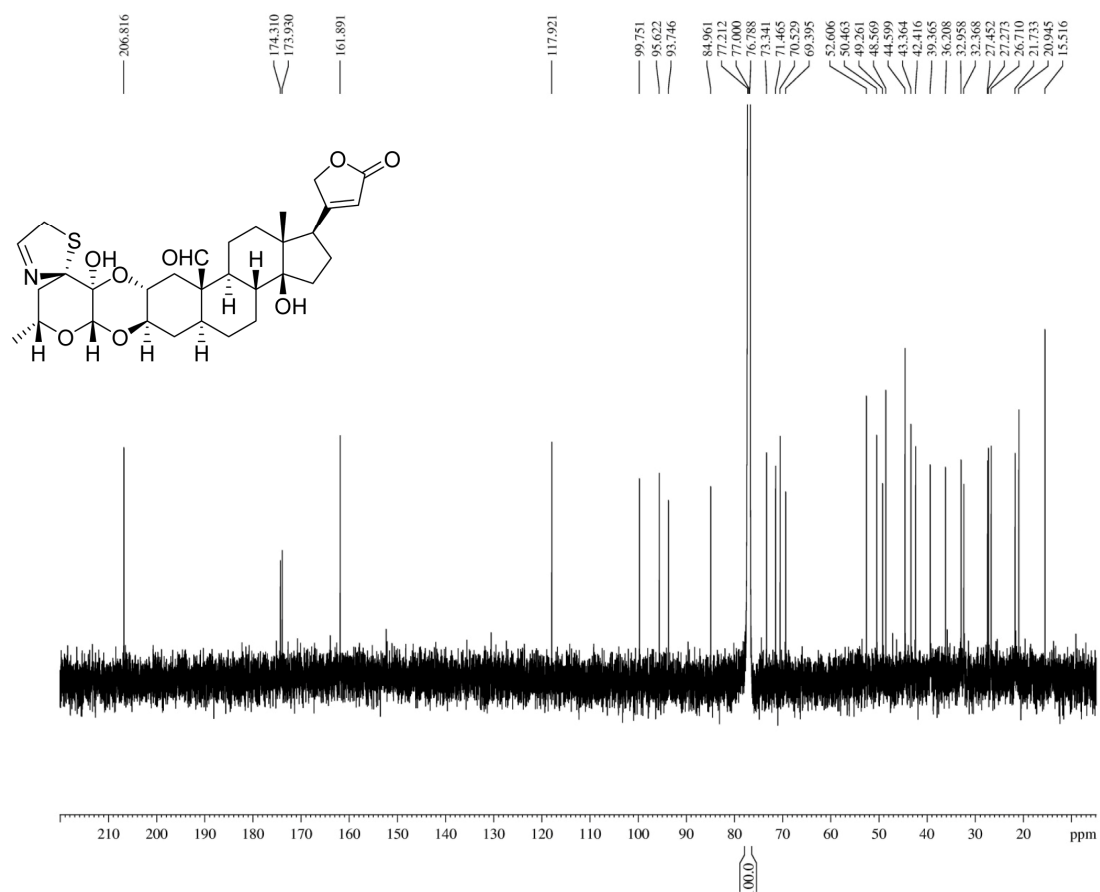

**Figure S11.** <sup>13</sup>C NMR (150 MHz, CDCl<sub>3</sub>) spectrum of the new compound **2**

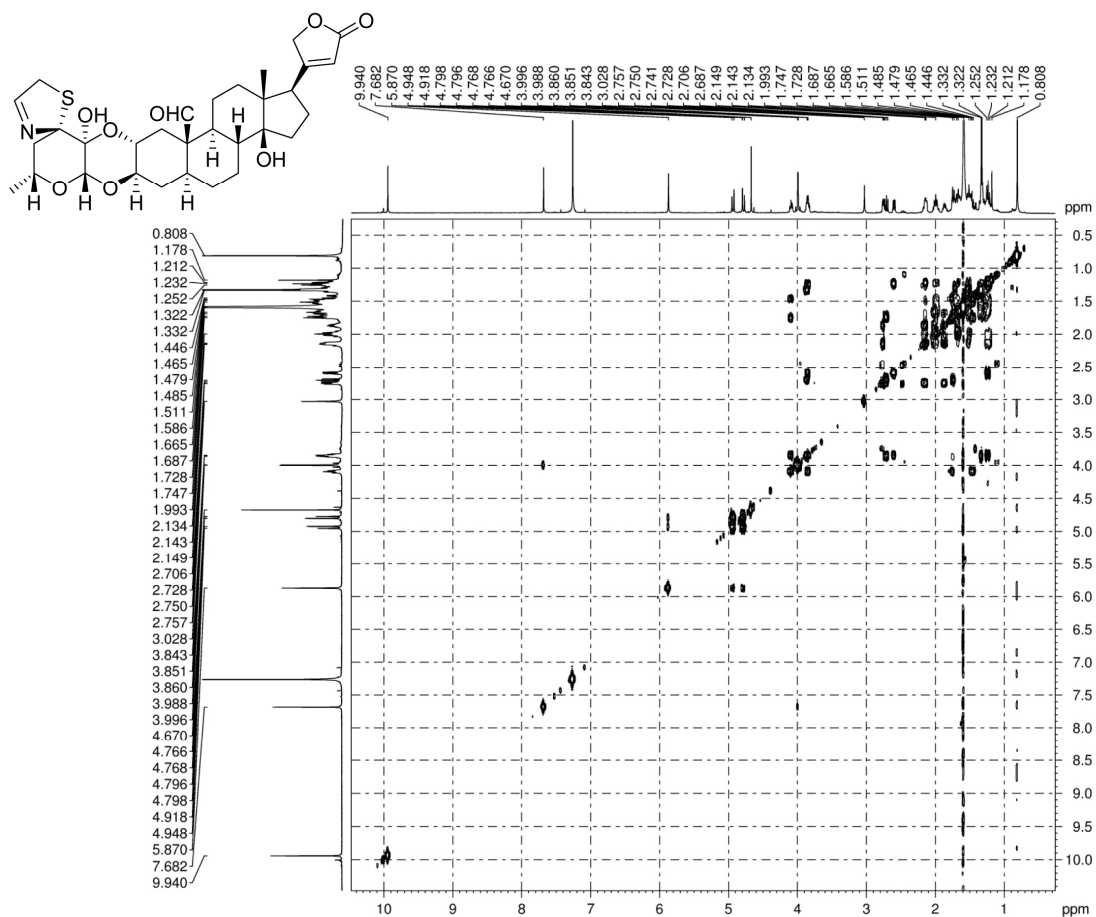

Figure S12.  $^1\text{H}$ - $^1\text{H}$  COSY spectrum of the new compound 2

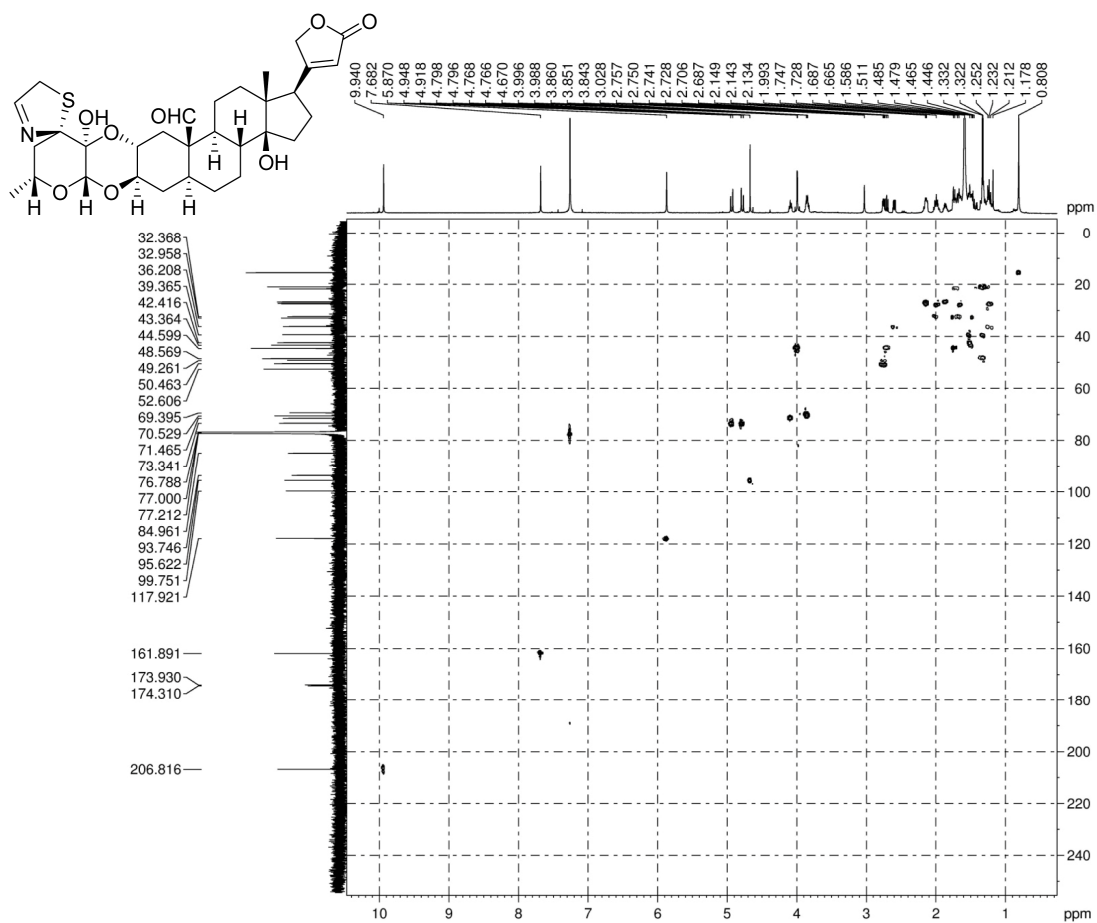

**Figure S13.** HSQC spectrum of the new compound **2**

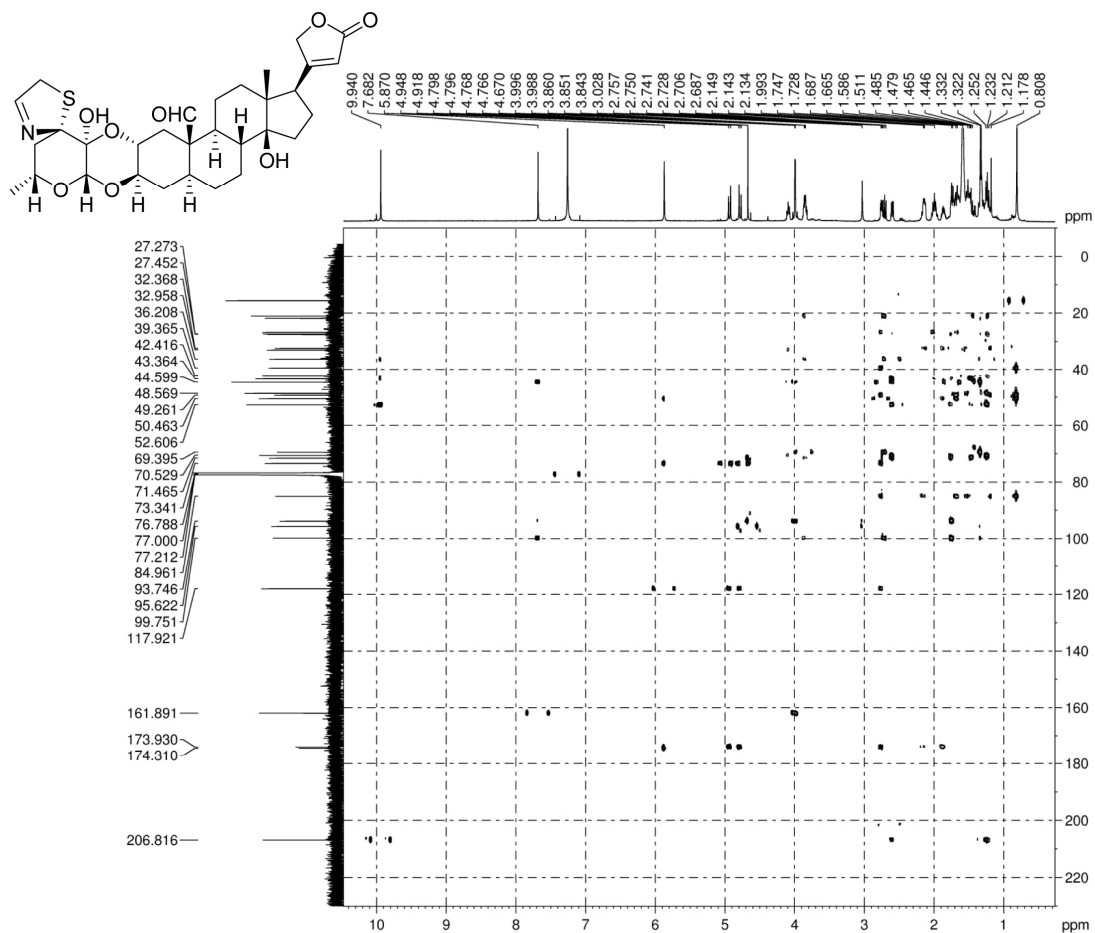

Figure S14. HMBC spectrum of the new compound 2

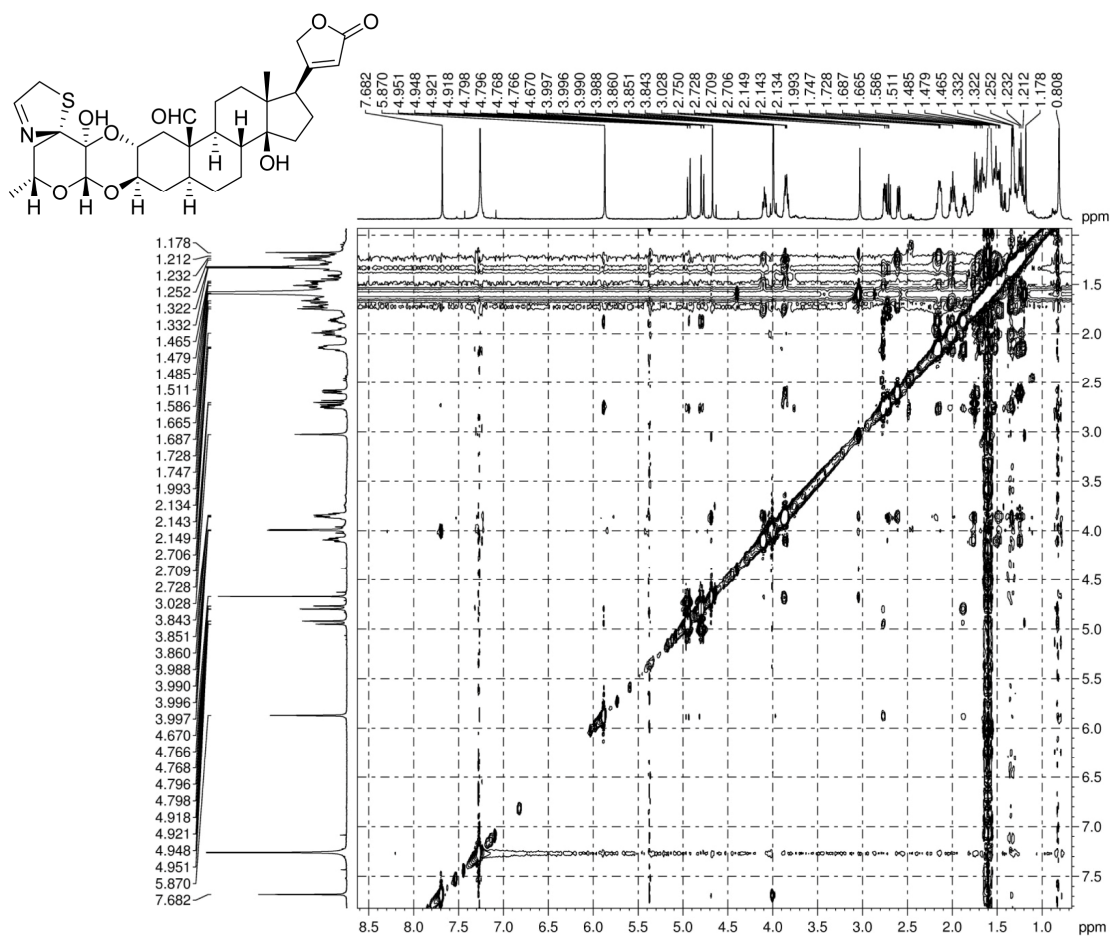

**Figure S15.** NOESY spectrum of the new compound **2**

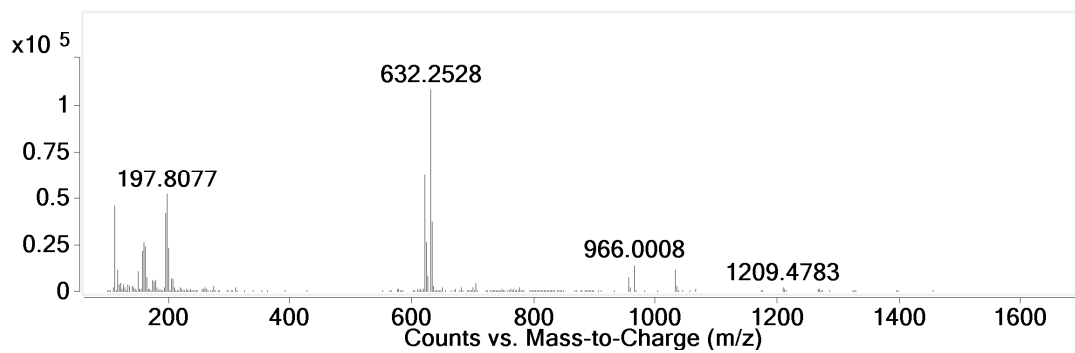

**Figure S16.** ESI-TOF-MS spectrum of the new compound **2**

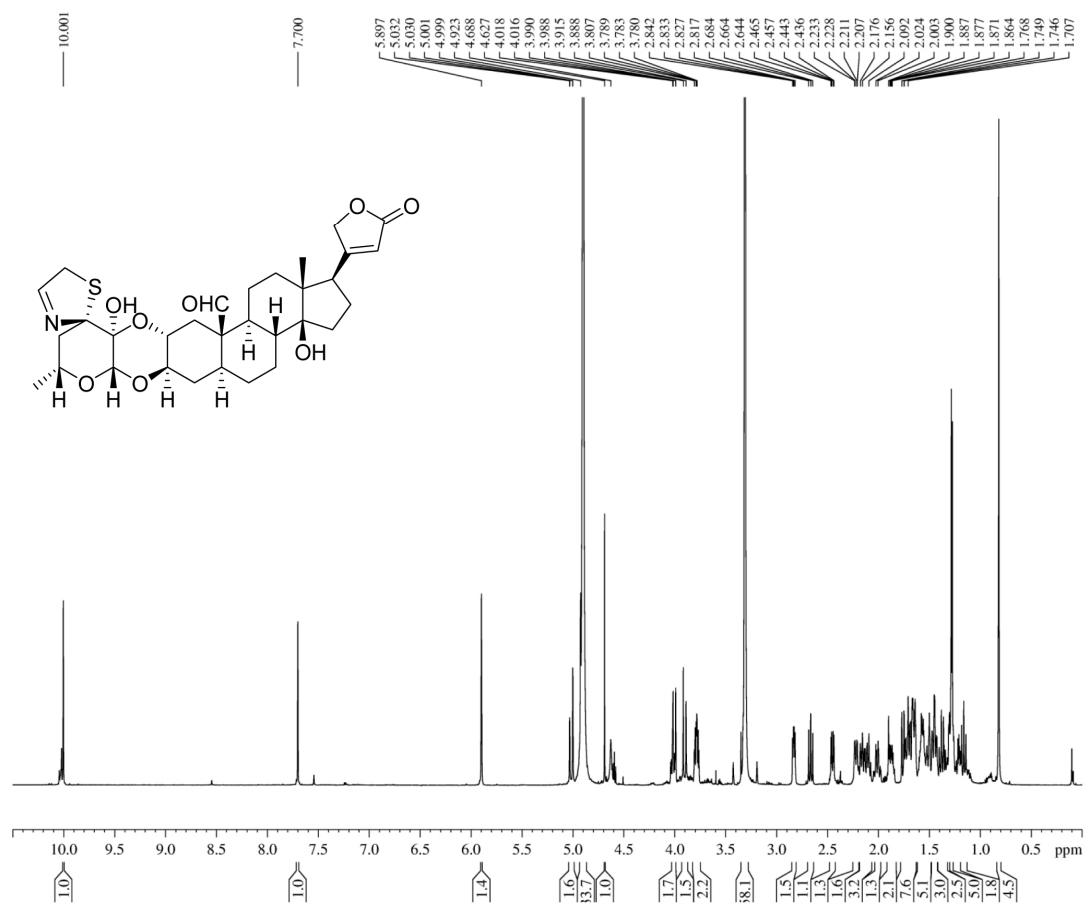

**Figure S17.**  $^1\text{H}$  NMR (600 MHz,  $\text{CD}_3\text{OD}$ ) spectrum of the new compound **2**



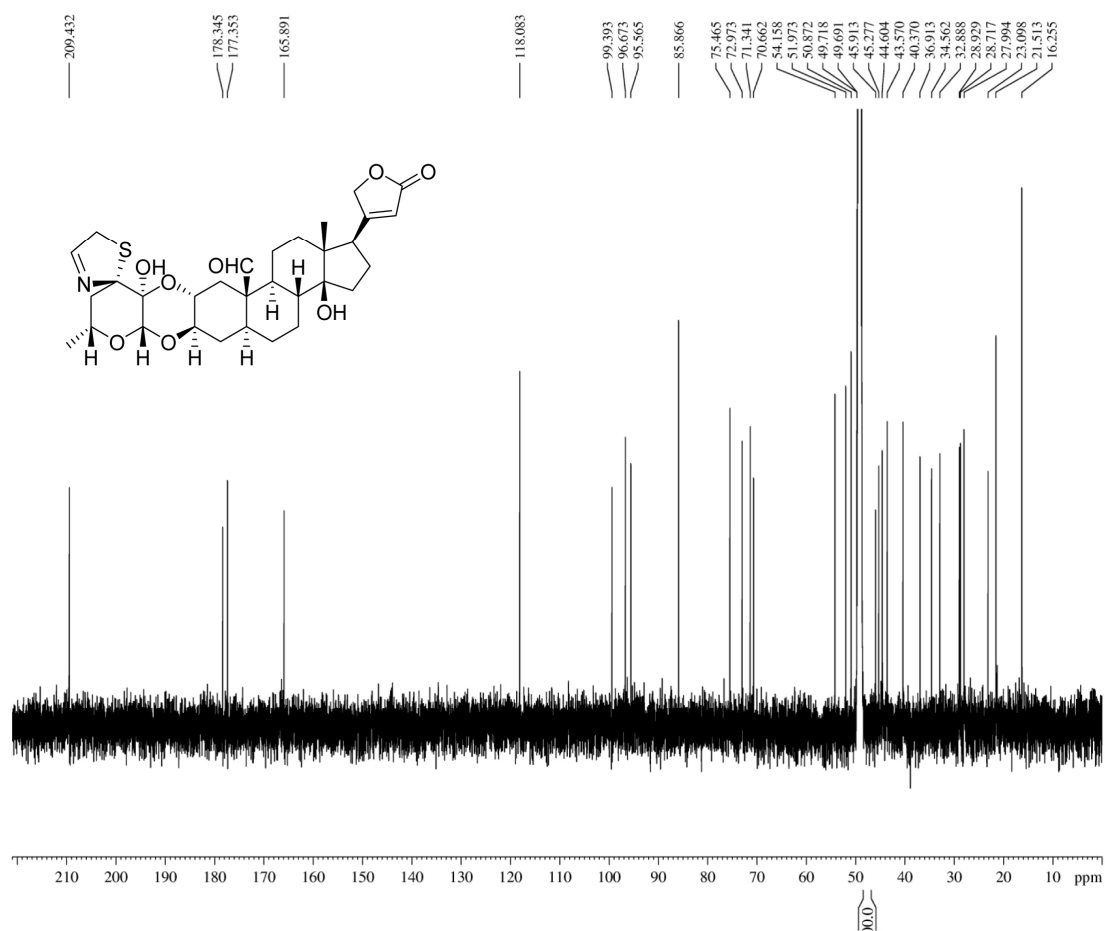

**Figure S18.** <sup>13</sup>C NMR (150 MHz, CD<sub>3</sub>OD) spectrum of the new compound **2**

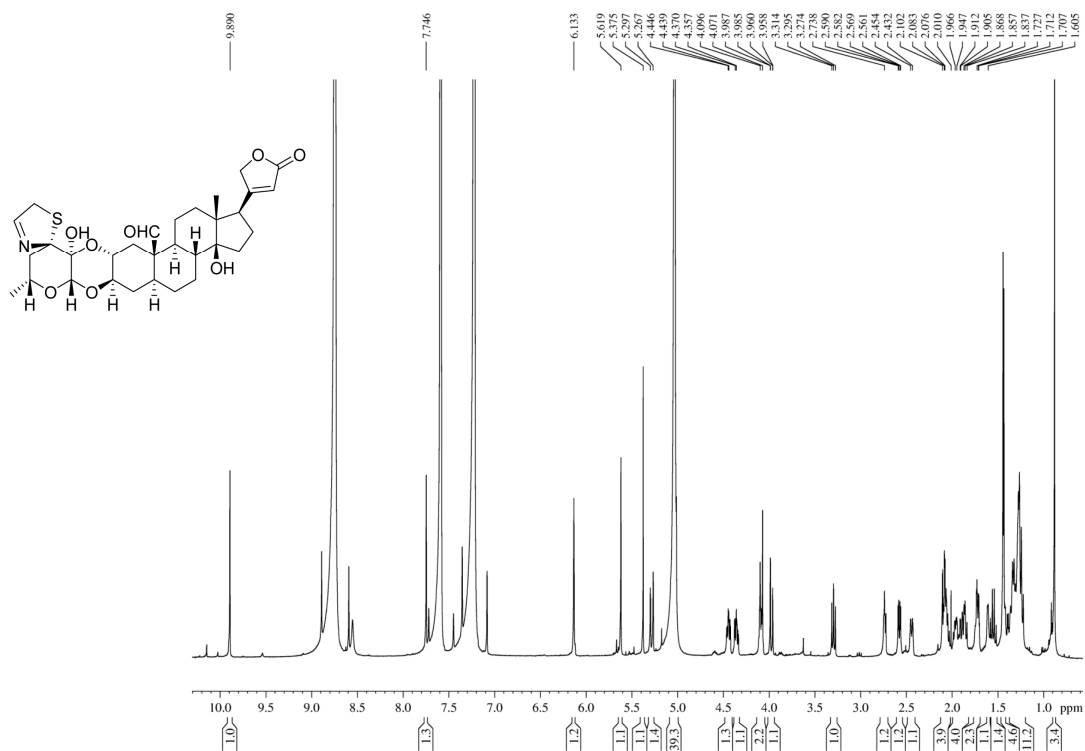

**Figure S19.**  $^1\text{H}$  NMR (600 MHz,  $\text{pyridine-}d_5$ ) spectrum of the new compound **2**

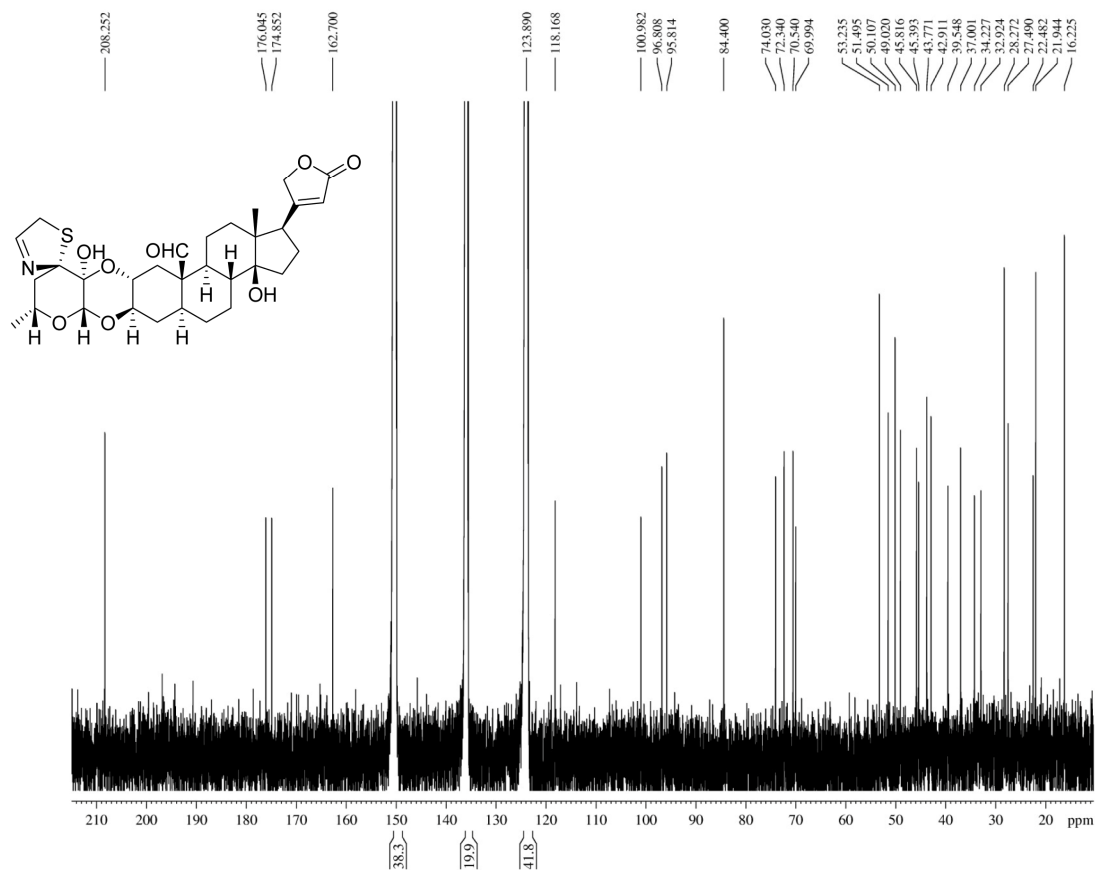

**Figure S20.**  $^{13}\text{C}$  NMR (150 MHz, pyridine- $d_5$ ) spectrum of the new compound **2**
